# Supplementary material for: A model for marine sedimentary carbonate diagenesis and paleoclimate proxy signal tracking: IMP v0.9
Source: Copernicus journal article supplement (doi:10.5194/gmd-2020-405), 2021-04-23
Supplement: Supplementary file [file gmd-2020-405-AC3-supplement.pdf]

### **Response to Referee #3 (Dr. Guy Munhoven)**

We express our gratitude to Dr. Guy Munhoven for his useful comments. Our response to the reviewer's comments and the corresponding revision are described in detail and separately below. The numbers of pages, lines, equations, tables and figures are those in the revised manuscript unless otherwise described.

#### General comment 1:

“The paper is generally well readable, although one stumbles here and there upon sentences whose meaning is not clear or whose syntax is not correct her. It would also gain a lot from a more precise language usage. These – minor – shortcomings should nevertheless be straightforward to fix.”

Response:

We agree to revise the manuscript to make it more precise and readable reflecting the review comments. Please see our response to general/specific comments and technical/minor corrections by the reviewer below.

Changes in manuscript (Page numbers/Line numbers):

Please see our changes in manuscript in response to general/specific comments and technical/minor corrections by the reviewer below.

#### General comment 2:

“The model description part is, however, of very uneven quality: while some parts are pleasantly detailed others are lacking even the most important information. It is, e.g., not explained how the O<sub>2</sub> penetration depth  $z_{ox}$  is calculated”

Response:

We did not elaborate upon the calculation of  $z_{ox}$  because it has already been conducted by e.g., Emerson (1985) and Archer (1991). However, we agree with the reviewer that more details might be useful to the reader.

We calculate  $z_{ox}$  together with OM and O<sub>2</sub> profiles iteratively. Specifically, the following steps are taken:

- (1)  $z_{ox}$  is calculated based on the O<sub>2</sub> profile from the previous iteration or time instance.
- (2) OM and aerobic respiration profiles are calculated using  $z_{ox}$  in step 1.
- (3) the O<sub>2</sub> profile is calculated based on OM and aerobic OM respiration profiles through the following sub-steps:
  - (i) First, no diffusive flux is assumed as the lower boundary condition. If the resultant O<sub>2</sub> profile

satisfies  $c_{O_2} > 0$  at all depth, then the  $O_2$  calculation is finished.

(ii) If the above calculation results in  $c_{O_2} \leq 0$  at any depth, a series of  $O_2$  profile calculations are conducted with assuming  $z_{ox} = z(i)$  where  $i = 1$  to  $N$  with the boundary condition of  $c_{O_2} = 0$  at  $z = z_{ox}$ . Out of  $N$  results, one where  $c_{O_2}$  is closest to 0 at  $z = z_{ox}$  is adopted.

(4) a new  $z_{ox}$  is calculated based on the  $O_2$  profile obtained in step 3.

(5) Steps 1–4 are repeated until  $z_{ox}$  in steps 1 and 4 are located in the same sediment layer or both below the calculation domain.

Changes in manuscript (Page numbers/Line numbers):

We added explanations such as above on how OM and  $O_2$  profiles are calculated iteratively (P11/L291-299).

#### General comment 3:

“The limitations of the diagenesis model are not discussed, not even mentioned. Sulfate reduction is the only sub-oxic/anoxic OM oxidation pathway, thus skipping the energetically more favourable  $NO_3$  reduction, Mn(IV) and Fe(III) reduction pathways. No secondary redox reactions are considered. Some discussion on the implications of these simplifications would be of order.”

Response:

As the reviewer pointed out, we did not address the effects of ignoring the OM decomposition by oxidants other than  $O_2$  and  $SO_4$ , including  $NO_3$ , and Mn- and Fe-(oxyhydr)oxides, as well as relevant secondary reactions. We agree that the effects of omitting these reactions are important to mention/discuss.

Contribution of oxidants other than  $O_2$  and  $SO_4$  to OM decomposition is likely  $< \sim 20\%$  on the global scale according Archer et al. (2002) and Thullner et al. (2009). Therefore, OM decomposition by  $O_2$  and  $SO_4$  is a reasonable simplification of DIC and ALK fluxes from the OM reaction network. Although the current model cannot explicitly simulate OM degradation by oxidants other than  $O_2$  and  $SO_4$ , an implicit implementation of an OM-decomposition-associated reaction is possible with IMP by adding DIC and ALK fluxes at a given depth although this option is enabled only for the Fortran version and is not used in this paper.

An example of usage of the above option is presented in Supplementary material, where the influence of DIC and ALK fluxes from anoxic oxidation of methane (AOM) in the deeper sediments on  $CaCO_3$  diagenesis is simulated. Please note that this simulation adopted a different sediment grid structure ( $z_{tot} = 200$  m) from that adopted in the main text ( $z_{tot} = 5$  m) as AOM is assumed to occur at 10 m (please also see our response to specific comment 3 by the reviewer).

Changes in manuscript (Page numbers/Line numbers):

We added explanations to Section 2.2.1 so that the current model's limitation on OM degradation becomes clearer (P5/L143-145). Also, we mentioned that an implementation of ALK and DIC fluxes caused by a reaction that is not explicitly simulated in the model is possible (P5/L145-147). An application example of the above option was added to the Supplementary material (Section S1.2 in Supplementary material).

General comment 4:

“Similarly, the strengths and disadvantages of the different bioturbation model formulations are not discussed (the biodiffusive approach leads to block tridiagonal Jacobians, that can be inverted by an efficient block oriented Thomas algorithm, whereas the LABS derived transition matrix is likely to be full, without any special structure) and thus contributing to a Jacobian that will be computationally costly to invert.”

Response:

We briefly mention the convergence difficulty when adopting LABS mixing and its cause in lines 432-437 of the previous manuscript. However, more details of the different mixing styles (or transition matrices) were not provided, which could be useful in order to discuss the numerical difference as inferred from the reviewer's comment. As pointed out by the reviewer, Jacobians are block tridiagonal with biodiffusion transition matrices, but not with homogeneous and LABS mixing as they are non-local mixing.

Transition matrices are represented with the transport probability  $\tau P_{\theta,ij}$ . We adopted a modified transition matrix  $K_{\theta,ij}$ , defined by Eq. (14), with which the difference equation of bio-mixing term becomes simple (Eq. (15)). Indeed, the matrix represented by components  $(1 - \phi_i)K_{\theta,ij}$  at  $(i, j)$  corresponds to the Jacobian matrix for the bio-mixing term of the governing equation and thus the numerical difficulty is easily compared between mixing styles by showing matrices represented by  $(1 - \phi_i)K_{\theta,ij}$  at  $(i, j)$  or transition matrices corrected for porosity.

Changes in manuscript (Page numbers/Line numbers):

We added explanations of transition matrices to Section 2.2.2 (P7/L201-203). A figure showing the porosity-corrected transition matrices for Fickian, homogeneous and LABS mixing are added, as they correspond to the bioturbational transport part of Jacobian matrix (P29, Fig. 1). We added a more detailed explanation of the differences in transition matrices and numerical implementations between mixing styles, referring to the new figure of the transition matrices (P8/L229-P9/L241).

General comment 5:

“Finally, the experiment descriptions also leave too many questions open. Here, especially the

species-dependent mixing experiment is poorly documented. The current text makes it impossible to understand how exactly the model has been set-up for this experiment.”

Response:

We found questions raised for the experiments by the reviewer in specific comments 15 and 16. Please see our response to specific comments 15 and 16 by the reviewer.

Changes in manuscript (Page numbers/Line numbers):

Please see our changes in manuscript in response to specific comments 15 and 16 by the reviewer.

We provided additional descriptions of the experimental setups where we found deficient in the previous manuscript (e.g., P19/L549).

Specific comment 1:

“Page 8, Eq. (23): Equation (23) is only valid for intraphase biodiffusion; for interphase bioturbation, there is an extra term related to the porosity gradient (see, e.g. Munhoven, 2021)”

Response:

We agree. However, please note that the transition matrix method is flexible enough to enable implementation of interphase biodiffusion as well, based on the finite difference version of the governing equation (e.g., Munhoven, 2011). Also, the difference between intraphase vs. interphase biodiffusion is not a focus of this study, as we compare more drastically different bio-mixing styles: e.g., both intraphase and interphase biodiffusion are local mixing while we compare local vs. non-local mixing in this paper. Nonetheless, we agree that it is important to note that biodiffusion implemented in Eq. (25) (Eq. (23) in the previous manuscript) is intraphase biodiffusion.

Changes in manuscript (Page numbers/Line numbers):

We added sentences explaining that implemented biodiffusion is intraphase diffusion (P8/L211-213, P9/L255, P10/L262).

Specific comment 2:

“Similarly, the strengths and disadvantages of the different bioturbation model formulations are not discussed (the biodiffusive approach leads to block tridiagonal Jacobians, that can be inverted by an efficient block oriented Thomas algorithm, whereas the LABS derived transition matrix is likely to be full, without any special structure) and thus contributing to a Jacobian that will be computationally costly to invert.”

Response:

Please see our response to general comment 4 by the reviewer where we address the issue.

Changes in manuscript (Page numbers/Line numbers):

Please see our changes in manuscript in response to general comment 4 by the reviewer.

Specific comment 3:

“Grid: The grid description is unfortunately not clear. It starts with a language problem: “[. . . ] discretized into  $N = 100$  irregular grids where the grid size increases [. . . ]” does not make sense. Reading this as “[. . . ] discretized into  $N = 100$  irregular grid intervals where the interval size increases [. . . ]”, and using the information provided in Table 2 (mapping function and control parameter value) to generate the underlying distribution (with 101 grid points delimiting 100 grid intervals), and paying attention to avoid catastrophic numerical cancellation in the factor  $(\beta - 1)$ , with  $\beta = 1 + 5 \cdot 10^{-11}$ , one obtains a very odd result: the deepest grid interval takes more than 81% of the total extent (405.8 cm), the second deepest 2.86% (14.3 cm) and the third one 1.68% (8.41 cm). So, provided the reported information on the grid generation is accurate, I would consider the bottom of the grid as essentially useless. The resulting extreme numerical diffusion might possibly deteriorate the quality of all the results. The extreme jump in the grid interval lengths by a factor of almost 30 from the second deepest to the deepest interval (compared to less than 2 from the third to the second deepest layer) will lead to tremendous numerical diffusion, which might significantly influence the results further up in the sediment column. Although the adopted mapping function from the normalized regular to the finally used irregular grid is continuous (and continuously differentiable) – a condition that irregular grid mappings have to fulfil to ensure that consistency and convergence order of the numerical discretization schemes remain unchanged – the difference in the grid interval lengths acts, from a practical point of view more, like a discontinuity, which might ruin the convergence properties of the algorithm.”

Response:

We agree to revise the sentence to be clearer on the grid structure. We define grid points as centers of grid cells/layers and  $N$  is defined as the number of grid points/cells/layers.

We did not argue that the user must use the grid of the present study. Rather it is just a default setting. Please see, for example, line 256 in the previous manuscript where we stated that one can assume a different grid structure. The user can change the grid structure by changing the total sediment depth as well as the  $\beta$  value with which the mapping function creates a different irregular (or even regular) grid.

The effect of numerical diffusion at deep depths in the default sediment grid in this study is already discussed in Section 2.4.2. We minimized the effect of numerical diffusion in deep sediment

layers on signal tracking by reading signals at the bottom of mixed layer, as explained in Section 2.4.2. This method should be effective to reduce the numerical diffusion regardless of the grid structure.

Numerical diffusion in deep sediment does not significantly affect diagenesis in upper column sediment in the simulations conducted in the present paper. As inferred from the reviewer's comment, most reactions occur within the mixed layer (e.g., Fig. 6) and thus introducing deep sediment layers to the model have little influences on overall  $\text{CaCO}_3$  diagenesis (please find an exception in the paragraph just below, related to the reason why we adopted the grid including deep layers).

We included deep sediment layers in the simulations presented in this paper because it allows us to illustrate the effects of numerical diffusion on signal tracking and also the method to minimize its effects regardless of grid structure (Section 2.4.2). Furthermore, the model is designed to be applicable even to locations where deep reactions such as anoxic oxidation of methane influence  $\text{CaCO}_3$  diagenesis (please also see our response to general comment 3 by the reviewer). For the above reasons, including deep layers is not completely useless.

As for numerical convergence,  $\text{CaCO}_3$  systems (multiple classes of  $\text{CaCO}_3$ , ALK and DIC) are solved until the maximum relative concentration difference of all species at all depths become less than  $10^{-6}$ . This criterion has been satisfied in all simulations shown in this paper. Please also note that the model always checks the satisfaction of the governing equations by monitoring depth integrated fluxes of all relevant time change rate terms for all species. Namely, for each simulated species, fluxes caused by amount change in sediment (cf. 'non-steady-state' flux; Kanzaki et al., 2019), advection, diffusion, bio-mixing, raining, individual reactions, and so on, as well as the residual of all the above fluxes (which should ideally always be zero). The residual fluxes have always been negligible (e.g.,  $<10^{-6}$  of the imposed rain fluxes) for all the species in all the simulations and thus we consider that the governing equations are satisfactorily solved with negligible errors even with the irregular grid used in this paper.

To demonstrate that the grid structure can be flexible in IMP and does not affect the results, we repeated the same dissolution experiments as in Section 3.2.2 but with adopting a shallower ( $z_{\text{tot}} = 50$  cm) and less irregular ( $\beta = 1.05$ ) grid in the Supplementary material (Section S1.4). Please note that the grid becomes more irregular when  $\beta$  is closer to 1 and compare with the default grid in the manuscript ( $z_{\text{tot}} = 500$  cm and  $\beta = 1+5\times 10^{-11}$ ). The obtained depth profiles as well as tracked proxy signals are very similar to the results in Section 3.2.2, supporting that numerical convergence is satisfied with the default grid and also that the proxy tracking scheme in Section 2.4.2 works regardless of the grid structure.

Changes in manuscript (Page numbers/Line numbers):

The sentence relevant to the definition of  $N$  was revised (P10/L269-271).

We added an example of using a different grid structure to the Supplementary material (Sections

S1.2 and S1.4). We referred to the Supplementary material where we state that the user can adopt different grid structures (P10/L271-273).

We added explanations on convergence criteria and the satisfaction of the governing equations in all the simulations to Section 2.3.2 (P11/L322, P12/L329-333).

Specific comment 4:

“One might furthermore wonder why the model grid has to extend to a depth of 5 m. The useful (“undisturbed” information is tapped at a much shallower depth, just below the mixed layer (i.e., typically at 10–20 cm depth). With a calcite/clay input mass ratio of about 9:1, at most of the order of 10 cm of sub-mixed-layer sediment can possibly be unburied during a chemical erosion event and the information stored in the gridded part of the sediment column deeper than, say 20–30 cm is actually not required here..”

Response:

Please see our response to specific comment 3 by the reviewer where we address the issue mostly.

We agree with the reviewer that most reactions occur within 10–20 cm depths. Nonetheless, the capability to adopt different grid structure increases the applicability of the model even to specific sites such as those where DIC and ALK are significantly produced from deep AOM (e.g., Bradbury and Turchyn, 2019, *Earth Planet. Sci. Lett.* 519, 40). Please also note that we did not argue that the model must assume the specific grid structure adopted in this paper; rather we stated that the user can adopt a different grid structure.

Changes in manuscript (Page numbers/Line numbers):

Please see our changes in manuscript in response to specific comment 3 by the reviewer.

Specific comment 5:

“I finally also wonder whether the recorded “undisturbed” signal would be consistent with the signal recorded in the main sediment column, even if there were no numerical diffusion – numerical diffusion was put forward as a reason for tapping the useful information right below the mixed layer: even in the absence of numerical diffusion, the signal in the main column may be altered by sub-mixed-layer chemical reactions. Furthermore, if chemically altered material later becomes subject to chemical erosion (i.e., returns to the mixed-layer), its composition can be expected to be different from that in the “undisturbed” record. How important might the resulting inconsistencies be?”

Response:

As commented by the reviewer (please see our response to specific comment 4 by the reviewer),

most of the reactions (at least those simulated in the main text) occur within the mixed layer. Nonetheless, the model can read and record proxy signals at a different depth point than the bottom of mixed layer by specifying the reading point within the code. The flexibility of IMP to use different grid structures (e.g., modifying  $z_{\text{tot}}$ ,  $N$  and  $\beta$ ) and reading points will allow the model to deal with the case when chemical reactions propagate below the mixed layer.

Changes in manuscript (Page numbers/Line numbers):

We mentioned that the flexibility of the depth point where signals are read in the revised manuscript (P14/L396-399).

Specific comment 6:

“Page 10, lines 267–273: Why not move this transition matrix representation of the biodiffusive model of bioturbation to Sect. 2.2.2 (“Bioturbation”)? In that place it would contribute to emphasize the overarching nature of the transition matrix approach. A priori, it was not clear in my mind that biodiffusion could also be part of the transition matrix approach (albeit in discretized form).”

Response:

Agreed.

Changes in manuscript (Page numbers/Line numbers):

Revised as suggested (P8/L204-P8/L228).

Specific comment 7:

“Section 2.5.1 (pages 10–11): This is obviously the central part of this manuscript. I find it quite short in that respect. The advantages/disadvantages (potentials/shortcomings) of the different methods could be stated in more detail. I would also like to challenge the authors on several assertions made here. I do not see why method 3 is less flexible than methods 1 and 2. To me, methods 2 and 3 are mathematically speaking absolutely identical. The only difference I can see is in the way the input data have to be processed. That processing can, however, be considered to be carried out outside the model itself.”

Response:

Please see our response to specific comment 8 by the reviewer where we address the issue about advantages/disadvantages of methods 1 and 2.

The processing of input proxy signals is closely linked to how we define  $\text{CaCO}_3$  classes to be simulated within sediment and their rain fluxes. Without this procedure, the model cannot do signal



tracking diagenesis (Sections 3.2 and 3.3) and thus is a crucial part of the model.

We agree that method 3 can be regarded as a derivative of method 2 as stated in line 364. However, method 3 is not completely the same as method 2. Method 3 in the current version tracks  $\delta^{13}\text{C}$ ,  $\delta^{18}\text{O}$ ,  $\Delta_{47}$  and  $^{14}\text{C}$  age using 5  $\text{CaCO}_3$  classes that correspond to 5 isotopologues:  $\text{Ca}^{12}\text{C}^{16}\text{O}_3$ ,  $\text{Ca}^{12}\text{C}^{18}\text{O}^{16}\text{O}_2$ ,  $\text{Ca}^{13}\text{C}^{16}\text{O}_3$ ,  $\text{Ca}^{13}\text{C}^{18}\text{O}^{16}\text{O}_2$ , and  $\text{Ca}^{14}\text{CO}_3$  (Section 3.3 and Section S1.1.2 in the Supplementary material). On the other hand, method 2 can track  $\delta^{13}\text{C}$  and  $\delta^{18}\text{O}$  with 4  $\text{CaCO}_3$  classes that possess unique combinations of the maximum and/or minimum input signal values (e.g., Sections 3.2.1 and 3.2.3). We can evaluate the flexibility of the two methods by considering the case where we attempt to track  $\delta^{11}\text{B}$  instead of  $\delta^{18}\text{O}$ . It is not possible to track  $\delta^{11}\text{B}$  with the above 5 classes of method 3 because  $\delta^{11}\text{B}$  cannot be defined by any combinations of the above 5 isotopologues. However, it is possible to track  $\delta^{11}\text{B}$  with method 2 because one only has to use input values of  $\delta^{11}\text{B}$  as those of  $\delta^{18}\text{O}$  and obtained signal records can be regarded as those for  $\delta^{11}\text{B}$ . Thus method 2 is more flexible than method 3.

Changes in manuscript (Page numbers/Line numbers):

Please see our changes in manuscript in response to specific comment 8 by the reviewer.

We added more explanations on method 3 (P13/L366-367, P13/L370-371).

We also added a section conducting experiments using method 3 (Section 3.3, P20/L601-P22/L646), which we believe will help the reader better understand the difference of method 3 from method 2.

Specific comment 8:

“Page 12, lines 332–345: The discussion about how time tracking could be implemented is, as far as I can see, not entirely correct. Obviously, method 1 would be extremely costly to adopt for time, but it clearly is the one that would offer the best time resolution. Method 1 essentially discretizes the complete age-dimension carried by one sedimentary component (e.g., calcite) as an ever-growing number of  $\text{CaCO}_3$  variants, each one representing one age-class. I is difficult to comprehend how method 2 could possibly conserve more accurate information with only two variables, compared to method 1. For any given time-step, the input data for method 1 are given by one single class, and those for method 2 by one interpolated value between the end members. To me, one appears as accurate as the other, for any given single time-step. For the next time step, another single class is created and added for method 1, while another interpolated value between the end members is added for method 2, and so forth. After n time steps with method 1, one can clearly distinguish between the fates of each single class of material brought in during the n steps; with method 2, this is not possible, as the n interpolates have been added, with little chance to deconvolve the resulting information. So, to me, method 1 is the accurate one, not method 2.”

Response:

We agree with the reviewer that “one appears as accurate as the other”. This has been actually confirmed (Supplementary material). As a useful feature of IMP, one can compare the results of three signal tracking methods. When tracking  $\delta^{13}\text{C}$  and  $\delta^{18}\text{O}$ , the three methods yield essentially the same results, although the accuracy of method 1 compared to the other methods depends on the number of tracked  $\text{CaCO}_3$  classes or the resolution with which model time is discretized, confirming the disadvantage of method 1 described in the manuscript and by the reviewer. Indistinguishable results between methods 2 and 3 suggests that the results with method 2 should be consistent with those from the traditional models of signal tracking diagenesis (e.g., Keir, 1984) where a direct tracking method is adopted.

The argument by the reviewer that particle information tends to be lost or uncaptured in method 2 is not necessarily the case. For instance, when one tracks a proxy in  $\text{CaCO}_3$  particles that belong to a single model species with the common physicochemical properties (size etc.), then method 2 does not miss any information relative to method 1. More generally, method 2 does not miss any information relative to method 1, as long as physicochemical properties that change with proxy signals are tracked. Please note that a physicochemical property of  $\text{CaCO}_3$  particles (e.g., size) can be tracked as a proxy by either method. With method 1, each class of  $\text{CaCO}_3$  particles can possess any number of proxies as well as physicochemical properties (an advantage; please see, however, the numerical disadvantage of the method above). With method 2, one has to multiply the number of  $\text{CaCO}_3$  classes by 2 per addition of one proxy or one physicochemical property to be tracked so that each  $\text{CaCO}_3$  class has a unique combination of end-member proxy values and physicochemical properties (a potential numerical disadvantage; please also see our response to minor/technical correction 15 by the reviewer).

As such, methods 1 and 2 are both accurate if an infinite computational power would be available. However, the computational disadvantage of method 1 tends to overwhelm because a fine time resolution is needed to obtain ‘good’ results especially when time-dependent diagenesis is simulated (please also see our response to specific comment 10 by the reviewer where we address the issue about the time steps adopted by the model).

Changes in manuscript (Page numbers/Line numbers):

We added more explanation to Section 2.4.1 (P12/L344, P12/L353-P13/L357, P13/L376-378).

We added Tables 4 and 5 where we list the properties of  $\text{CaCO}_3$  classes used for the experiments in Sections 3.2.3 and 3.3 to make it easier for the reader to understand how method 2 or 3 can track particle properties (P48).

Please also see our changes in manuscript in response to specific comment 10 and minor/technical correction 15 by the reviewer.

Specific comment 9:

“Page 14, lines 410–412: “This difference can be explained by a burial velocity enhancement caused by high organic matter preservation in the oxiconly model, which is not considered by Archer (1991).” This is probably correct, but why not check it instead of speculating? This can be easily done by setting  $V_{OM}$  to 0.”

Response:

We confirmed our argument by conducting lysocline experiments with  $V_{OM} = 0$ .

Changes in manuscript (Page numbers/Line numbers):

We added the results of the lysocline experiments to the Supplementary material (Section S2.1) and referred to them in the relevant sentence (P16/L480).

Specific comment 10:

“Throughout: there seems to be a mismatch between “time step” and “instants in time” Actually, no information about the step lengths (time steps) adopted for the integration of Eq. (1) in time.”

Response:

We agree that little information on time steps was provided in the previous manuscript.

Changes in manuscript (Page numbers/Line numbers):

We provided information on time steps (P12/L324-328). We also corrected where “time step” and “instants in time” are misused (e.g., P15/L432)

Specific comment 11:

“Page 14, lines 398–400: “Absence of significant void spaces or expansions in solid sediment has been adopted as a convergence diagnostic by the sediment diagenesis model of Archer et al. (2002), [ . . . ]” This sentence could possibly be misunderstood, as this is actually not the only diagnostic used by Archer et al. (2002). Their convergence diagnostic is first “[. . . ] based on conservation of mass to within 2% for all solid phase and dissolved constituents (appropriate balances between rain, reaction, diffusion, and burial rates).” (Archer et al., 2002, p. 17-4, par. [19]). They continue writing that the sum of the solid phase concentrations also provides a convergence diagnostic.”

Response:

We did not state or argue that Archer et al. (2002) adopted the sum of solid phase concentrations as the only diagnostic. Nonetheless, we agree with the reviewer that the relevant sentence might cause a

potential misunderstanding of the model by Archer et al. (2002) and thus agree to revise the sentence.

Changes in manuscript (Page numbers/Line numbers):

We revised the sentence to avoid potential misunderstanding (P16/L466-468).

Specific comment 12:

“Conserving mass to within a few % only – a side-effect of requiring letting the sum of the solids’ volume fractions float within a few % (line 255, page 9)) – might be sufficient for steady-state calculations. In transient simulation experiments, I would anticipate that deviations of the order of a few % could cause considerable model drift in transient simulation experiments. It would be better not to leave any loose ends and therefore to enforce strict static volume conservation.”

Response:

In the updated version of the model (v1.0), we enabled the calculation scheme of clay concentration by Munhoven (2021), which is based on the volume conservation Eq. (22) and thus with which the total solid volume fraction diverges only negligibly from 1. The calculation with this new scheme yields essentially the same results as those with the previous version (v0.9) for the experiments conducted in this study. We changed the default method of clay calculation to the above scheme although the clay calculation scheme used in v0.9 (i.e., solving Eq. (1) directly) still remains in the code and can be chosen. Accordingly, all figures are reproduced (Figs. 6-16) with the new clay calculation scheme.

Changes in manuscript (Page numbers/Line numbers):

We changed the default calculation scheme of clay concentration and its description (P11/L305-307). Figure 6-15 were accordingly all revised (P34-43).

Specific comment 13:

“The statement at line 400 (“The results of the second experiment thus confirm [. . . ]”) is a non sequitur. The results do not confirm the applicability of the model for time-dependent simulation experiments: they only do not infirm it.”

Response:

We agree.

Changes in manuscript (Page numbers/Line numbers):

We deleted the sentence.

Specific comment 14:

“Page 15, lines 437ff : Although I understand that multiplying the transition matrix by 1/10 might facilitate the calculation, it also reduces the mixing intensity by a factor 10, and thus describes a completely different setting. Are the results for the so reduced mixing intensity accepted as final in case the calculations converge, or are they used as a starting point for a continuation method, wherein the mixing intensity is then gradually increased to approach the original matrix? I think that the results obtained with the matrix divided by 10 cannot be used for a comparison with others where no such reduction was adopted.”

Response:

The original LABS transition matrix was obtained in a LABS simulation where a biodiffusion coefficient was estimated to range from 0.1 to 10 cm<sup>2</sup> yr<sup>-1</sup> based on particle displacements (cf., Kanzaki et al., 2019). Therefore, a factor of 1/10 is likely reasonable as it makes LABS mixing comparable with Fickian mixing (0.15 cm<sup>2</sup> yr<sup>-1</sup>). We did not change transition matrices during a simulation.

Changes in manuscript (Page numbers/Line numbers):

We added more information on LABS mixing adopted in this paper (P8/L218-228). Please also find that we added a figure to compare transition matrices corrected for porosity (corresponding to Jacobian matrices) between different mixing styles in response to general comment 4 by the reviewer (P29).

Specific comment 15:

“Section 3.2.3, pages 17–18 This experiment needs to be better documented. Critical information is missing here: what bioturbation model has been used to get these results? In the text, we read about different bioturbation depths for small and large particles, with reference to Bard (2001). The bioturbation model of Bard (2001) is, mathematically speaking, rather convoluted and it is not clear to me how it might be transposed to the transition matrix framework adopted here. At first sight, it is possibly a homogeneous mixing model, but I am not entirely even sure that it is possible to transpose it at all into the transition matrix framework of IMP. In that model, the bioturbation depth is the main control parameter. How that bioturbation depth has been used as a control parameter here – if it has, which is unclear as well – is not explained. Please make this description more complete and if necessary also provide additional theoretical foundations”

Response:

We did not use the mixing model of Bard (2001) but referred to the study by Bard (2001) because we adopted different mixing depths for different size classes of  $\text{CaCO}_3$  as in Bard (2001). We used Fickian and homogeneous mixing as defined by Eqs. (18) and (19). For the fine species these equations also reflect the change in mixed layer depths (i.e. to 20cm).

Mixed layer depth is one of the parameters that control bio-mixing and the transition matrices as explicitly formulated in Eqs. (18) and (19) in Section 2.2.2. We provided the depths of mixed layers for fine and coarse species, which are sufficient to create the transition matrices for Fickian and homogeneous mixing, with all other parameters remaining the same based on Eqs. (18) and (19). We thus do not consider additional theoretical foundations are necessary. We agree to provide more details to avoid potential confusion.

Changes in manuscript (Page numbers/Line numbers):

We added more descriptions regarding the bio-mixing adopted in the experiment in Section 3.2.3 (P20/L580-582, P20/L584).

Also we added a table (Table 4) so that it is easier to understand the properties of  $\text{CaCO}_3$  classes used for the experiment in Section 3.2.3 (P48).

Specific comment 16:

“It should also be noticed that some theoretical homework is of order when it comes to different mixing rates for small and large particles. The solids’ advection rate is actually always defined as the movement rate of the bulk solids (Meysman et al., 2005, see, e.g.). Accordingly, the advective rate may not be equal to  $w$  in Eq. (1) – this is already not the case when interphase biodiffusion is adopted as a bioturbation model. In case a biodiffusion model is used, it should be noticed that Eq. (23) is not applicable (this is mentioned as a sufficient condition at lines 214–216 for Eq. (23) to hold, but it is also necessary).”

Response:

We consider that we have provided enough theoretical framework to calculate  $w$  even for a simulation that enables different mixing styles between solid species. As formulated in Eq. (21),  $w$  is defined as moving velocity of bulk solids as in other models including Munhoven (2021), i.e., all solid species are advected with the rate  $w$ . The  $w$  profile is calculated according to Eq. (21) accounting for the volume changes of all solid species including multiple  $\text{CaCO}_3$  classes caused by reactions and mixing (local or non-local). Thus changing mixing styles between solid species does not change the calculation scheme of  $w$ , that is essentially based on Eq. (21). Please find that applicability of Eq. (25) (Eq. (23) in the previous manuscript referred to by the reviewer), a simplification of Eq. (21), is quite limited, only when all solid species are bio-mixed in intraphase diffusion with the same mixing depths and biodiffusion coefficients for all solid species as stated in

lines 255-264. For example, introducing a single solid species characterized by a different mixed layer depth to the above case makes Eq. (25) inapplicable and Eq. (21) has to be used instead. This ensures that the different solid volume distribution of the species caused by mixing to a different mixed layer depth is correctly reflected in the calculation of solid-phase advection-rate profile.

We agree that when we adopt the interphase biodiffusion for bio-mixing, Eq. (25) is not applicable. In that case, one has to adopt Eq. (21) to calculate  $w$  using the corresponding transition matrix.

Changes in manuscript (Page numbers/Line numbers):

We emphasized that Eq. (25) is only applicable when bio-mixing is intraphase biodiffusion with the same mixing intensity and depth for all the solid species (P9/L255, P10/L262).

We also stated that including interphase biodiffusion requires a different transition matrix from that created by Eq. (18) (P8/L213).

Technical and minor correction 1:

“Abstract: Please include the meaning of the model name acronym somewhere in the abstract.”

Response:

We agree to put the meaning of the model name acronym in the abstract.

Changes in manuscript (Page numbers/Line numbers):

We put the full model name in the abstract (P1/L10-11).

Technical and minor correction 2:

“Page 3, lines 65–66: “The reason for this is that published sediment mixing models are generally unable to realize diagenetic reaction” – not sure what is meant here (should “are generally unable to realize” possibly read “do generally not take into account”?)”

Response:

Agreed.

Changes in manuscript (Page numbers/Line numbers):

Corrected as suggested (P3/L65-66).

Technical and minor correction 3:

“Page 3, line 81: “Following presentation” should read “Following the presentation” (or “After the presentation” ?)”

Response:

Agreed.

Changes in manuscript (Page numbers/Line numbers):

Corrected as suggested (P3/L81).

Technical and minor correction 4:

“Page 4, line 91: Is it possible to “share” distinct characteristics?”

Response:

We meant ‘possess the common, distinct characteristics’.

Changes in manuscript (Page numbers/Line numbers):

We corrected the sentence in accord with our response above (P4/L92).

Technical and minor correction 5:

“Page 6, line 160: “mocsy” should read “mocsy 2.0””

Response:

We thank the reviewer for pointing this out.

Changes in manuscript (Page numbers/Line numbers):

Corrected as suggested (P6/L165).

Technical and minor correction 6:

“Pages 6 and 7: The notation  $dz_i$  for the thickness of layer  $i$  is not recommendable, as there are later ratios of such thicknesses are used (e.g., page 7, Eqs. (13) and (14)), which could be confused with derivatives and thus lead to unnecessary misunderstandings. I suggest to replace  $dz_i$  by  $\delta_i$  or  $\Delta_i$ , perhaps  $h_i$ .”

Response:

Agreed.



Changes in manuscript (Page numbers/Line numbers):

We changed  $dz_i$  to  $\delta z_i$  (P7/L184-185, P7/L187, P7/L190, P7/L195).

Technical and minor correction 7:

“Page 7, line 181: Is  $A$  the horizontal cross-sectional area?”

Response:

Yes.

Changes in manuscript (Page numbers/Line numbers):

Changed the description of  $A$  (P7/L186).

Technical and minor correction 8:

“Page 7, lines 195–196: Very cumbersome and syntactically incorrect sentence. I suggest to reformulate it as ”Equation (15) is a finite difference version of Eq. (17) . . . .””

Response:

We agree to revise as suggested.

Changes in manuscript (Page numbers/Line numbers):

Revised as suggested (P7/L200).

Technical and minor correction 9:

“Page 8, lines 212 and 213: I suggest to replace  $D_b$  by  $D_{\theta_b}$  or something the like in these two instances to emphasize that different bioturbation coefficient values may be used for different particle classes (different classes of particles are later supposed to be transported in different ways by bioturbation) The special case for a single  $D_b$  for all solids then comes more naturally at line 214.”

Response:

Agreed.

Changes in manuscript (Page numbers/Line numbers):

Corrected as suggested (P8/L207, P8/L209-210, P9/257-258).

Technical and minor correction 10:

“Page 9, lines 236–237: This sentence may be misleading, as “specified at the beginning of each time integration” could be wrongly interpreted as saying that an time-explicit approach is used in IMP”

Response:

We agree to revise the relevant sentence to avoid potential confusion.

Changes in manuscript (Page numbers/Line numbers):

We revised the sentence (P10/L284).

Technical and minor correction 11:

“Page 9, lines 253: How is “significantly different” translated quantitatively?”

Response:

Burial velocity is regarded to be converged when the relative difference becomes less than  $10^{-6}$  from the previous iteration. When this criterion is not met within 20 iterations (only encountered in a few conditions in lysocline experiments), the solution with minimum relative difference is adopted (still less than a few %).

Changes in manuscript (Page numbers/Line numbers):

Description such as above was added to Section 2.3.2 (P11/L309-313).

Technical and minor correction 12:

“Page 10, lines 277ff : Wich version of LABS was used here in the end? Reed et al. (2007)? Or was it eLABS (Kanzaki et al., 2019)? Please specify.”

Response:

We used the eLABS code by Kanzaki et al. (2019), but we disabled the new functionalities in eLABS (e.g., 2D reactive-transport of oxygen and OM as well as fluid flow) to obtain a transition matrix controlled dominantly by biological parameters.

Changes in manuscript (Page numbers/Line numbers):

The description such as above was added to Section 2.2.2 (P8/L218-221).

Technical and minor correction 13:

“Page 10, Equation system (24): First of all, this way of defining ( $K_{\theta,ij}$ ) is difficult to understand. At first it looks like some kind of implicit definition. Is there not more clear way to write this? Second there seem to be two errors:

- “ $2 \leq j = i + 1 = n_{ml}$ ” should probably read “ $2 \leq j = i + 1 \leq n_{ml}$ ”
- “ $1 \leq j = i - 1 = n_{ml} - 1$ ” should probably read “ $1 \leq j = i - 1 \leq n_{ml} - 1$ ””

Response:

We thank the reviewer for pointing out the typos, which were made when the first author changed the manuscript format from Microsoft Word to LaTeX.

Changes in manuscript (Page numbers/Line numbers):

Corrected as suggested (P8/L209).

Technical and minor correction 14:

“Page 11, line 309: “[. . .] and accompanied generation of alkalinity, [. . .]”: not sure what this could mean. With  $\text{Ca}^{14}\text{CO}_3/\text{CaCO}_3$  ratios of the order of  $10^{-14}$ , alkalinity changes by  $\text{Ca}^{14}\text{CO}_3$  decay should really be on the negligible side of life.”

Response:

Alkalinity can be produced assuming carbonate  $^{14}\text{C}$  is decayed into nitrate  $^{14}\text{N}$ . We agree that alkalinity production by radiocarbon decomposition is minute.

Changes in manuscript (Page numbers/Line numbers):

We added more explanations such as above to Supplementary material where method 3 (the direct tracking method) is detailed.

Technical and minor correction 15:

“Page 11, lines 294 and 298: “ $2^{n_p}$ ” should read “ $2n_p$ ” as each proxy requires two end-members.”

Response:

With method 2 (interpolation method) for signal tracking, each  $\text{CaCO}_3$  class must have a unique combination of end-member proxy values. In other words, the number of  $\text{CaCO}_3$  classes required to track  $n_p$  proxies is identical to the number of possible unique combinations of endmember proxy values. Because one class of  $\text{CaCO}_3$  can have either of 2 end-member values for a given proxy, the total number of possible unique combinations of end-member values for  $n_p$  proxies is give by

$$2^{\text{proxy 1}} \times 2^{\text{proxy 2}} \times \dots \times 2^{\text{proxy } n_p} = 2^{n_p}$$

Therefore, method 2 requires  $2^{n_p}$  CaCO<sub>3</sub> classes for tracking  $n_p$  proxies.

As an example, the experiment in Section 3.2.3 tracks 2 proxy and 1 physical property (i.e., size) and requires 8 classes of CaCO<sub>3</sub>.

Changes in manuscript (Page numbers/Line numbers):

We added more explanations such as above to the relevant sentences (P12/L354-P13/L357).

We also added 2 tables that tabulate the properties of CaCO<sub>3</sub> classes in simulations in Sections 3.2.3 and 3.3 to show that adding 1 proxy/property to be tracked necessitates an increase of the number of CaCO<sub>3</sub> classes by a factor of 2 as in the above equation (P48).

Technical and minor correction 16:

“Page 13, lines 364–365: “5 time steps” should most probably read “five instants in time”. By the way, which time step was chosen for the integration? A variable one? a constant one – how long?”

Response:

We agree to correct the sentence.

The time step can be specified by the user. In the default setting, it was dependent on the phase of experiment: during spin-up phase to the initial steady state, it increases with model time, from 100 to 10<sup>5</sup> yr; then, time step is either 5 or 10 yr for a 10 kyr or 50 kyr signal change event, respectively; and the time step afterwards to reach another steady state is the same as that in the signal change event.

Changes in manuscript (Page numbers/Line numbers):

The sentence was corrected as suggested (P15/L432).

We added explanations such as above to Section 2.3.2 (P12/L324-328).

Technical and minor correction 17:

“Page 13, lines 377ff : It would be fair to state that these are replications of experiments from Archer (1991).”

Response:

Agreed.

Changes in manuscript (Page numbers/Line numbers):

We added “(cf. Archer, 1991)” to line 441 (P15/L441).

Technical and minor correction 18:

“Page 14, line 392–393: Strange sentence. – please reformulate.”

Response:

Agreed.

Changes in manuscript (Page numbers/Line numbers):

We revised the sentence (P16/L460-461).

Technical and minor correction 19:

“Page 14, line 410: “than Archer (1991) model” would more correctly read “than the model of Archer (1991)””

Response:

Agreed.

Changes in manuscript (Page numbers/Line numbers):

Revised as suggested (P16/L478).

Technical and minor correction 20:

“Page 14, line 434: “provability” should probably read “probability””

Response:

We are grateful to the reviewer for pointing out the typo.

Changes in manuscript (Page numbers/Line numbers):

We corrected the typo as suggested (P17/L501).

Technical and minor correction 21:

“Page 14, line 413: “in CaCO<sub>3</sub> rain” should read “of the CaCO<sub>3</sub> rain””

Response:

Agreed.

Changes in manuscript (Page numbers/Line numbers):

Revised as suggested (P16/L482).

Technical and minor correction 22:

“Page 15, line 439: “are now shown” should read “are not shown”, I guess.”

Response:

Apologies for many typos and we are grateful to the reviewer for pointing them out.

Changes in manuscript (Page numbers/Line numbers):

We corrected the typo as suggested (P17/L503).

Technical and minor correction 23:

“Page 16, line 455: would “at depths” not better read “from depths”?”

Response:

Agreed. But we removed the sentence in the revised manuscript.

Changes in manuscript (Page numbers/Line numbers):

The sentence was removed.

Technical and minor correction 24:

“Page 16, lines 470 and 472: Text imprecise: chemical erosion requires dissolution, but dissolution does not necessarily lead to chemical erosion. Please reformulate.”

Response:

Agreed.

Changes in manuscript (Page numbers/Line numbers):

We changed ‘chemical erosion’ to ‘significant dissolution’ in the sentence (P18/L534).

Technical and minor correction 25:

“Page 17, line 490: “When dissolution is imposed [. . . ]”? Would “When dissolution is intensified [. . . ]” not be more correct?”

Response:

Agreed.

Changes in manuscript (Page numbers/Line numbers):

Revised as suggested (P19/L555).

Technical and minor correction 26:

“Page 17, lines 503–504: “Simulated proxy signals are considerably shorter in apparent duration as described in the above paragraph.” – not sure what this means.”

Response:

We meant that signal changes are recognized in shorter depth intervals.

Changes in manuscript (Page numbers/Line numbers):

Corrected in accord with the above response (P19/L568-569).

Technical and minor correction 27:

“Page 18, line 520: “the more” should read “the better””

Response:

Agreed.

Changes in manuscript (Page numbers/Line numbers):

Revised as suggested (P20/L591).

Technical and minor correction 28:

“Page 18, line 521: “accumulation rate differs between” would better read “accumulation rates are different for””

Response:

Agreed.

Changes in manuscript (Page numbers/Line numbers):

Revised as suggested (P20/L592).

Technical and minor correction 29:

“Page 18, line 539: “The source codes of IMP model” should read “The IMP source codes” (delete “model”)”

Response:

Agreed.

Changes in manuscript (Page numbers/Line numbers):

Revised as suggested (P22/L660).

Technical and minor correction 30:

“Page 18, line 540: “specific version used of the model” should read “specific model version used””

Response:

Agreed.

Changes in manuscript (Page numbers/Line numbers):

Revised as suggested (P22/L661).

Technical and minor correction 31:

“Page 22, lines 636–637: This URL points to the secondary JSTOR archive copy of the reference. It better had to be replaced by the DOI of the original paper (available in open access): DOI:10.5670/oceanog.2009.100”

Response:

Agreed. We are grateful to the reviewer for pointing this out.

Changes in manuscript (Page numbers/Line numbers):

We revised the DOI of the referred paper (P26/L763-764).

Technical and minor correction 32:



“Page 24, line 710: The DOI of the MATLAB version 1.1 of CO2SYS is not resolving any more. The current URL is [https://cdiac.ess-dive.lbl.gov/ftp/co2sys/CO2SYS\\_calc\\_MATLAB\\_v1.1](https://cdiac.ess-dive.lbl.gov/ftp/co2sys/CO2SYS_calc_MATLAB_v1.1).”

Response:

We are grateful to the reviewer for pointing this out.

Changes in manuscript (Page numbers/Line numbers):

The URL of CO2SYS has been updated (P28/L845).

### Technical and minor correction 33:

“Page 39, Table 1:

- I guess, “Number of sediment grids” means “Number of sediment grid points” as there is most probably only one grid.
- For the density of OM, a value of  $1.2 \text{ g/cm}^3$  is reported with reference to Mayer et al. (2004). I have not been able to find that value of  $1.2 \text{ g/cm}^3$  in Mayer et al. (2004). Considering the  $\rho_{\text{OM}}$  values reported for marine samples in Table 1 of that reference, I find a higher value of  $1.45 \pm 0.23 \text{ g/cm}^3$ . Please clarify.

It would be good to specify more clearly that  $\text{OM} \equiv \text{CH}_2\text{O}$ . Only in this case some of the ratios such as the  $\text{OM}:\text{CaCO}_3$  ratio  $r$  make sense, as one mole of OM then represents one mole of OC. Readers used to Redfield composition might be confused else.”

Response:

We agree on the first point.

Mayer et al. (2004) did not argue that the middle value of their reported range ( $1.14\text{--}1.68 \text{ g cm}^{-3}$ ) is the most likely density of sediment OM. We have taken a value close to the lower limit of their reported range because choosing a relatively high value might not be able to reproduce a wide range of sediment density, which can be as low as  $1.2 \text{ g cm}^{-3}$  (e.g., Hamilton, 1976, *J. Sediment. Res.*, 46, 280). Also,  $1.2 \text{ g cm}^{-3}$  is not necessarily unreasonably low value. For instance, other models take similar values (e.g.,  $1.0 \text{ g cm}^{-3}$  by Meyers, 2007).

We agree to clarify that  $\text{OM} \equiv \text{CH}_2\text{O}$ .

Changes in manuscript (Page numbers/Line numbers):

We revised Table 1 in accord with the above response (P45).

We clarified  $\text{OM} \equiv \text{CH}_2\text{O}$  at the beginning of Section 2.2 (P4/L114).

### Technical and minor correction 34:

“Figures 2, 7, 8, 10: It is recommended not to use green and red/orange colours tones in parallel on a graph (see <https://www.geoscientific-modeldevelopment.net/submission.html> - “Figures & Tables”, point 7)”

Response:

We are grateful to the reviewer for pointing this out to us and useful URL.

Changes in manuscript (Page numbers/Line numbers):

We changed colors in Figs. 3, 8, 9 and 11 (Figs. 2, 7, 8 and 10 in the previous manuscript) (P31, P36, P37, P39). Other figures are also modified using colorblind safe colors (cf. <https://personal.sron.nl/~pault/>) (P34-35, P38, P40-43).
